# Supplementary material for: Characterization of the Lipid Oxidation Process of Robusta Green Coffee Beans and Shelf Life Prediction during Accelerated Storage
Source: PubMed Central journal article supplement (PMC7179143; doi:10.3390/molecules25051157), 2020-03-05
Supplement: molecules-25-01157-s001.pdf [file molecules-25-01157-s001.pdf]

Supplementary material

Figure S1. The effect of temperature and time on the moisture content of green coffee bean during accelerated storage.

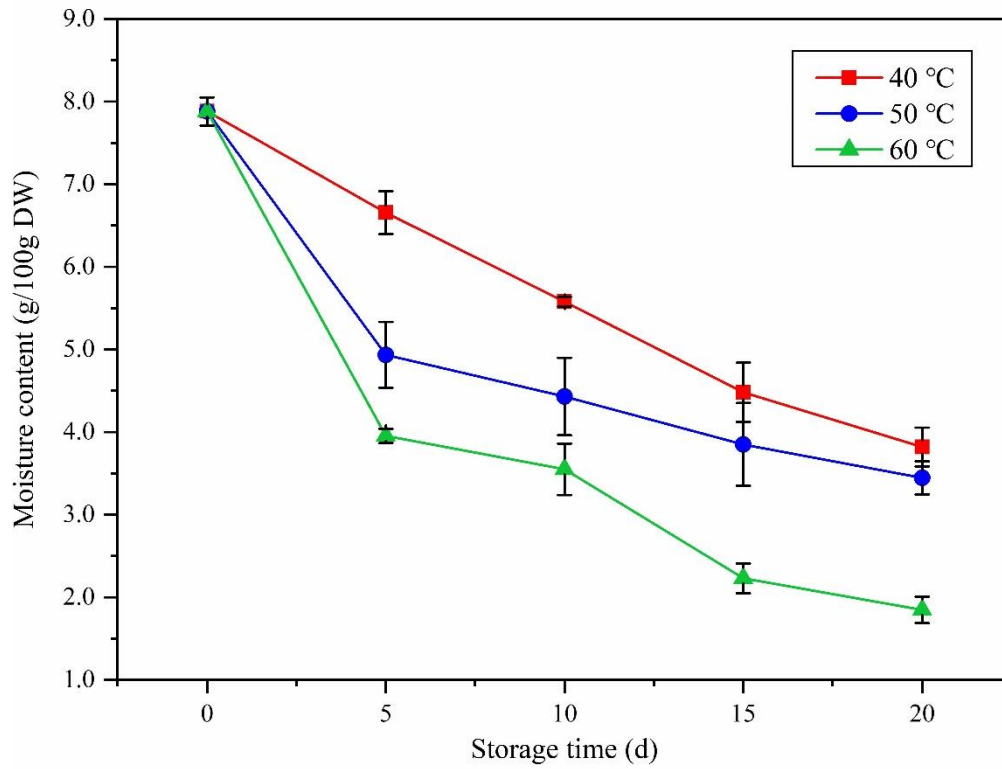

6

Figure S2. Changes in absorbance of green coffee beans during accelerated storage at 232 nm (a) and 268 nm (b).

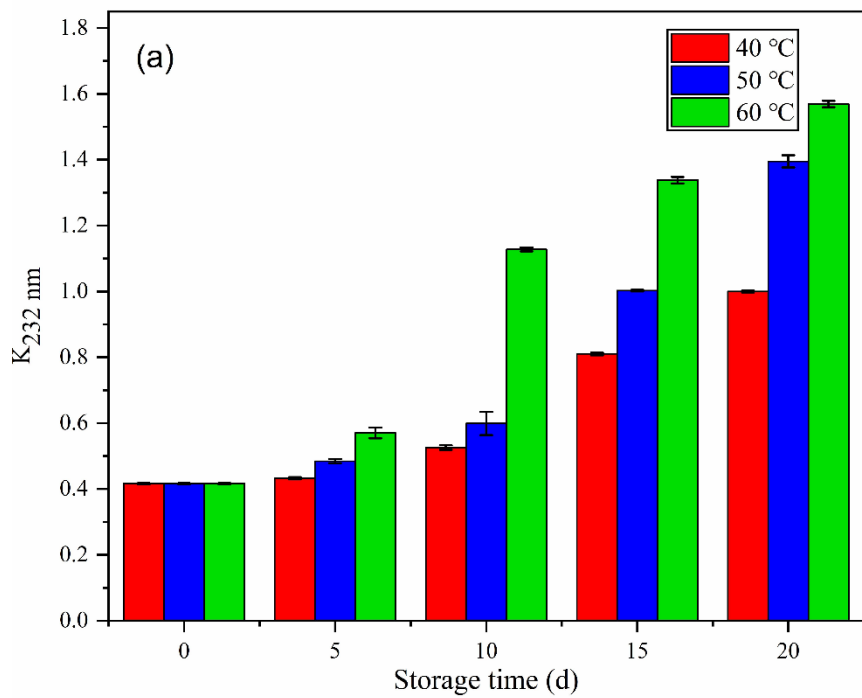

33

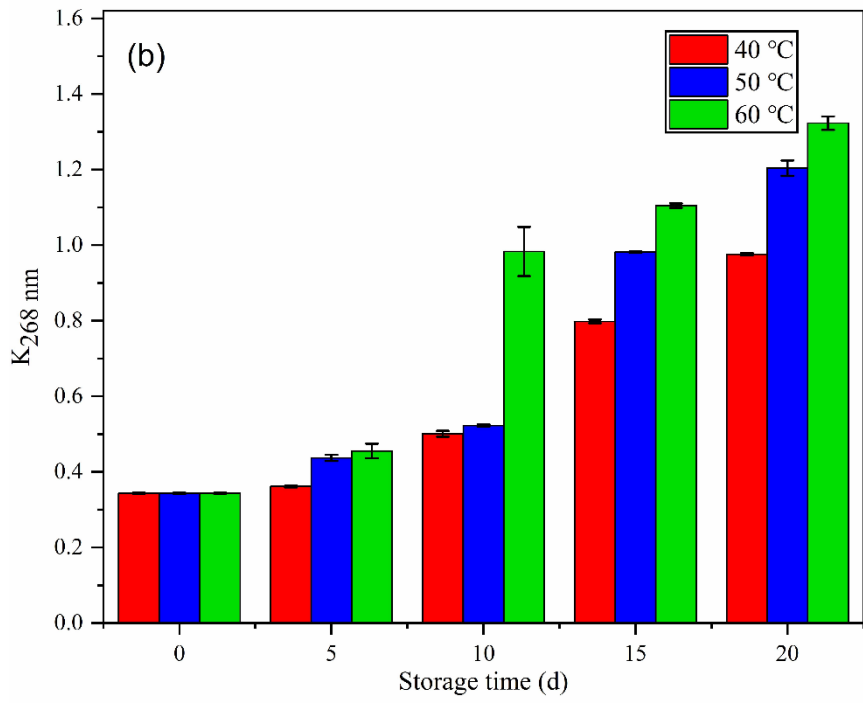

**Table S1.** The changes in the peroxide values (PVs) at various temperatures during accelerated storage were determined by fitting the data to kinetic models, and shelf life predictions were achieved using the Arrhenius equation.

| Temperatures | Zero-order model         | $R^2$ | First-order model             | $R^2$ | Arrhenius equation            | Predicted shelf life (d) |
|--------------|--------------------------|-------|-------------------------------|-------|-------------------------------|--------------------------|
| 40 °C        | $PV = 0.0040t + 0.3170$  | 0.881 | $\ln(PV) = -0.0007t + 0.0293$ | 0.936 |                               | 57.39                    |
| 50 °C        | $PV = 0.0062t + 0.3770$  | 0.924 | $\ln(PV) = -0.0009t + 0.0336$ | 0.957 | $\ln(k) = -2267.5/T + 4.0191$ | 44.44                    |
| 60 °C        | $PV = -0.0183t + 0.6315$ | 0.953 | $\ln(PV) = -0.0017t + 0.0501$ | 0.960 |                               | 23.12                    |
